# Supplementary material for: A multifunctional cardanol-based room-temperature phosphorescent material with multi-stimulus-responsive shape-memory for anti-counterfeiting and encryption
Source: Royal Society of Chemistry journal article supplement (doi:10.1039/d5mh00551e), 2025-01-01
Supplement: d5mh00551e1.pdf [file d5mh00551e1.pdf]

## Supporting Information

### **Multifunctional cardanol-based room-temperature phosphorescent material with multi-stimulus-responsive shape-memory for anti-Counterfeiting and encryption**

*Caiying Bo<sup>a\*</sup>, Yiran Fu<sup>a,b</sup>, Miao Li<sup>a</sup>, Lihong Hu<sup>a\*</sup>, Meng Zhang<sup>a\*</sup>, Fei Song<sup>a</sup>, Yonghong Zhou<sup>a\*</sup>*

<sup>a</sup>Institute of Chemical Industry of Forest Products, CAF; national Engineering Research Center for Low-Carbon Processing and Utilization of Forest Biomass, Key Lab. Of Biomass Energy and Material, Jiangsu Province, Jiangsu Co-Innovation Center of Efficient Processing and Utilization of Forest Resources, Nanjing 210042, People's Republic of China

<sup>b</sup>College of Materials Science and Engineering, Nanjing Forestry University, Nanjing 210037, People's Republic of China.

---

\* Corresponding authors. E-mail: newstar2002@163.com (Caiying Bo), ORCID: 0000-0002-7032-9931; hlh@icifp.cn (Lihong Hu); zhangmeng@icifp.cn (Meng Zhang); zyh@icifp.cn (Yonghong Zhou)

## **Contents**

|                                       |           |
|---------------------------------------|-----------|
| <b>1. Experimental section .....</b>  | <b>3</b>  |
| 1.1. Materials .....                  | 3         |
| 1.2. Characterization .....           | 3         |
| 1.3. Synthetic Procedure .....        | 5         |
| <b>2. Results and Discussion.....</b> | <b>8</b>  |
| <b>References .....</b>               | <b>18</b> |

## **1. Experimental section**

### **1.1. Materials**

Cardanol (~ 95%, Cardolite chemical Co., Ltd.), 3-Aminobenzeneboronic acid (Shanghai Macklin Biochemical Co., Ltd.) N, N-Bis(2-hydroxyethyl) ethylenediamine (98%, Wuhan Xinweiye Chemical Co., Ltd), N, N,N',N'-tetrakis(2-hydroxyethyl)ethylenediamine(99%, Macklin). All other chemicals and reagents were reagent grade and used without further purification in this study.

### **1.2. Characterization**

#### *1.2.1. Fourier transform infrared spectroscopy analysis (FT-IR)*

The FT-IR spectra were acquired on a Nicolet iS50 FTIR meter (Nicolet Instrument Crop., USA).

#### *1.2.2. Nuclear magnetic resonance analysis (NMR)*

<sup>1</sup>H nuclear magnetic resonance (NMR) spectra of samples in d-DMSO were recorded on a Bruker AV-300 Advance NMR spectrometer (Bruker Corporation, Germany) at 300 MHz

#### *1.2.3. Thermogravimetric Analysis (TGA)*

TGA was carried out on a STA 209F1 thermogravimetry instrument (Netzsch Corporation, Germany) within a temperature from 40 °C to 600 °C under N<sub>2</sub>.

#### *1.2.4. Photoluminescence excitation (PLE) and photoluminescence (PL) analysis*

Photoluminescence excitation, prompt emission and delayed emission spectra were measured on a FLS1000 fluorescence spectrophotometer (Edinburgh Instruments) under ambient condition.

#### *1.2.5. General reprocessing procedure*

The samples were first cut completely into fragments and then compressed at hot 80 °C, 10 MPa for 10 min. After cooling to room temperature, a recycled film was obtained.

#### *1.2.6. Mechanical property*

Mechanical property values were presented as the mean and standard deviation based on at least three trials using an UTM6503 instrument.

#### *1.2.7. Shape memory*

Shape-memory behavior testing: The thermally-induced shape memory behaviors were determined by thermo-mechanical analysis were conducted on DMA800 according to the procedure described in ref <sup>[1-2]</sup>. All samples were cut in rectangular pieces of approximately 10 mm×6.0 mm×0.5 mm. First, the samples were heated to programming temperature  $T_{\text{prog}}$  at the rate of 3 °C/min and held for 5 min before being stretched to the maximum stress. Then, while keeping a constant stress, they were rapidly cooled to below transition temperature  $T_{\text{low}}$  at 3 °C/min and held for 5 min. Finally, the stress was released to recovery temperature  $T_{\text{rec}}$  at 3 °C/min for triggering the shape recovery. The most significant parameters to evaluate the shape memory performance are the shape-recovery ratio ( $R_r$ ) and shape-fixity ratio ( $R_f$ ). They can be calculated by the following equations:

$$R_r = \frac{\varepsilon_{u(N)} - \varepsilon_{p(N)}}{\varepsilon_{u(N)} - \varepsilon_{p(N-1)}} \times 100 \quad (\text{S1})$$

$$R_f = \frac{\varepsilon_{u(N)} - \varepsilon_{p(N-1)}}{\varepsilon_{m(N)} - \varepsilon_{p(N-1)}} \times 100 \quad (\text{S2})$$

Where  $\varepsilon_u$  represents the strain after unloading,  $\varepsilon_p$  is the permanent strain after the shape recovery, and  $\varepsilon_m$  represents the maximum strain during loading. N in the equation denotes the cycle number.

IR light induced shape recovery: The samples were exposed to the irradiation of IR light at 1.8 W/cm<sup>2</sup>, and the photothermal behavior have been investigated using a FLIR Pro thermal imaging camera.

#### 1.2.8. Dynamic mechanical analysis (DMA)

DMA was performed on a Q800 solids analyzer (TA Corporation, USA) from -50 °C to 150 °C (3 °C/min, 1Hz). Cross-link density ( $v_e$ ) values of the cured materials can be calculated using the following equation<sup>[3]</sup>:

$$v_e = \frac{E}{3RT} \quad (\text{S3})$$

Where  $E$  is the storage modulus at rubbery states ( $T_g + 20$  °C),  $R$  is the gas constant (8.314 J/(mol·K)) and  $T$  is the Kelvin temperature of  $T_g + 20$ °C.

#### 1.2.9. Swelling tests

Samples were immersed in H<sub>2</sub>O, 1 mol/L NaOH, 1 mol/L HCl, hexane (HEX), EtOH, DMF, THF, acetonitrile (ACN), dichloromethane (DCM), ethyl

acetate (ACE), and toluene (TOL) for different times at ambient temperature.

$$\text{Swelling ratio (\%)} = \frac{m_s - m_i}{m_i} \times 100 \quad (\text{S4})$$

$$\text{Insoluble fraction (\%)} = 1 - \frac{m_i - m_d}{m_i} \times 100 \quad (\text{S5})$$

Where  $m_i$ ,  $m_s$  and  $m_d$  represent the weight of initial, swollen, and dry samples.

#### 1.2.10. Self-healing tests

The Self-healing tests of the materials were tested by Leica optical microscope (Germany, ICC50 W). The self-healing efficiency was calculated using the ratio of the reduced scratch width to the initial scratch width of the materials.

#### 1.2.11. Stress relaxation

The stress relaxation curves of the samples were conducted by DMA Q800 instrument with a strain value of 2% in “stress relaxation” mode. The activation energy ( $E_a$ ) of the cured materials was calculated using the following equations [4-5]

$$\ln \tau^* = \frac{E_a}{RT} - \ln A \quad (\text{S 6})$$

Where  $T$  is the absolute temperature,  $A$  is a pre-exponential factor, and  $R$  is the gas constant.

### 1.3. Synthetic Procedure

#### 1.3.1. Synthesis of card polyphenol glycidyl ether (CPGE)

45 g (~0.15 mol) of cardanol was added in a four-necked round-bottom flask equipped with a mechanical stirrer, thermometer sensor, and reflux condenser; then, 141.17g (1.5 mol) of phenol was added into the flask, followed by addition of 1.86 g of tetrafluoro boric acid. The resultant solution was allowed to react at 90 °C for 2 h. After the reaction was complete, the crude product was filtered and washed with excessive hot H<sub>2</sub>O. Finally, the organic phase was dried with anhydrous MgSO<sub>4</sub> and then filtered. Typically, card polyphenol reacted with epichlorohydrin under alkaline conditions to form card polyphenol glycidyl ether, The epoxy value of CPGE was 0.193 mol/ 100 g.

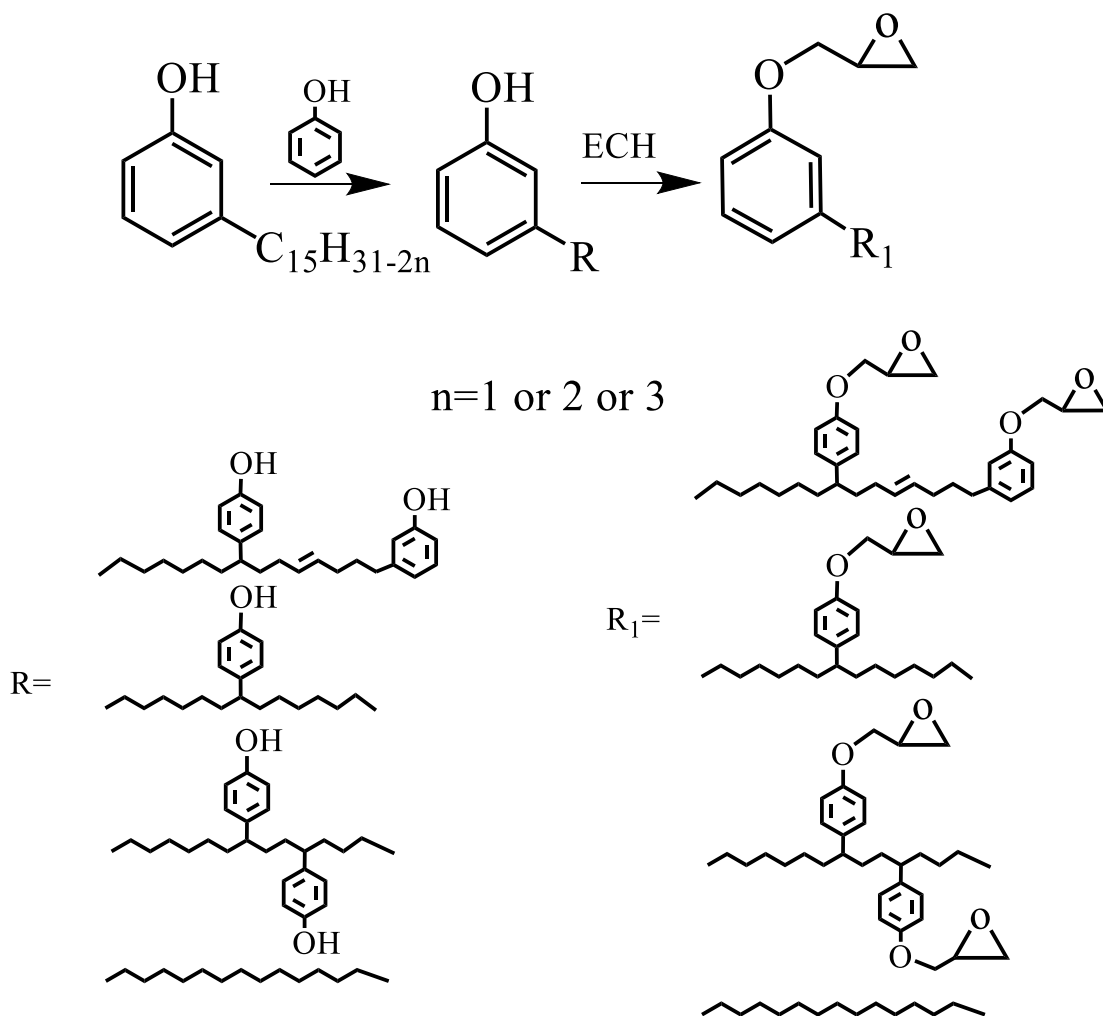

**Scheme S1.** Synthesis route of CPGE

### 1.3.2. Synthesis of *N*-coordinated bicyclic boronic ester amine compounds (BNAs)

*Synthesis of BNA-1:* N,N-Bis(2-hydroxyethyl)ethylenediamine (7.78 g, 52.50 mmol) and 3-aminobenzenboronic acid (6.85 g, 50 mmol) were mixed and dissolved in DMF (100 mL) at 40 °C, and the mixture was stirred for 1 h. The resulting mixture was reduced in volume by rotary evaporation under reduced pressure. Then a white powder product with the yield of 82 % was obtained after washing.

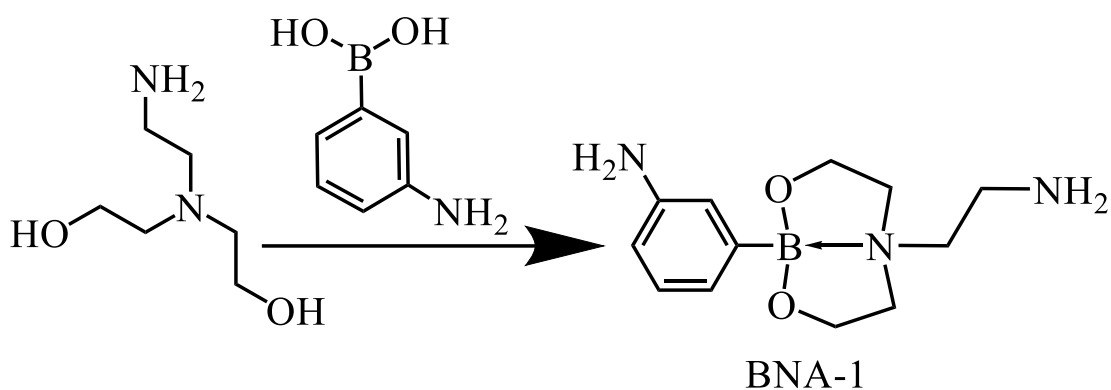

**Scheme S2.** Synthesis route of BNA-1

*Synthesis of BNA-2:* N,N,N',N'-tetrakis(2-hydroxyethyl)ethylenediamine (6.20g, 26.24 mmol) and 3-aminobenzenboronic acid (6.85g, 50 mmol) were mixed and dissolved in DMF (100 mL) at 40 °C, and the mixture was stirred for 1 h. The resulting mixture was reduced in volume by rotary evaporation under reduced pressure. Then a white powder product with the yield of 80 % was obtained after washing.

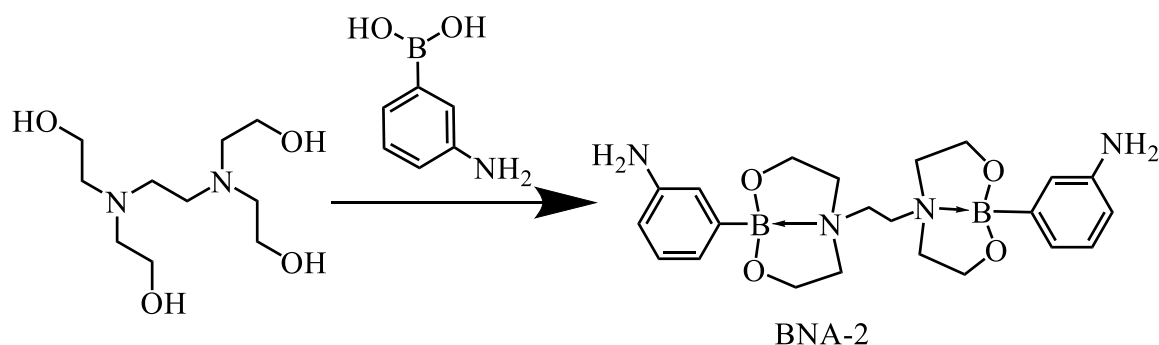

**Scheme S3.** Synthesis route of BNA-2

### 1.3.3. Preparation of cardanol-based epoxy resin CPGE-BNAs

As shown in Scheme S4, a certain amount of CPGE and BNAs were dissolved in 10 mL DMF. The obtained solutions were stirred at 120 °C for 7 h and dried at 80 °C in vacuum oven remove the DMF to make a smooth film. By changing the molar ratios of epoxy and amino group (0.8, 1.0, 1.2, 1.5, 1.8 and 2.0 respectively), the obtained CPGE-BNA1 were named as CPGE-BNA1-0.8, CPGE-BNA1-1.0, CPGE-BNA1-1.2 and CPGE-BNA1-1.5, respectively. Epoxy resin CPGE-BNA2 was name through the same method.

## 2. Results and Discussion

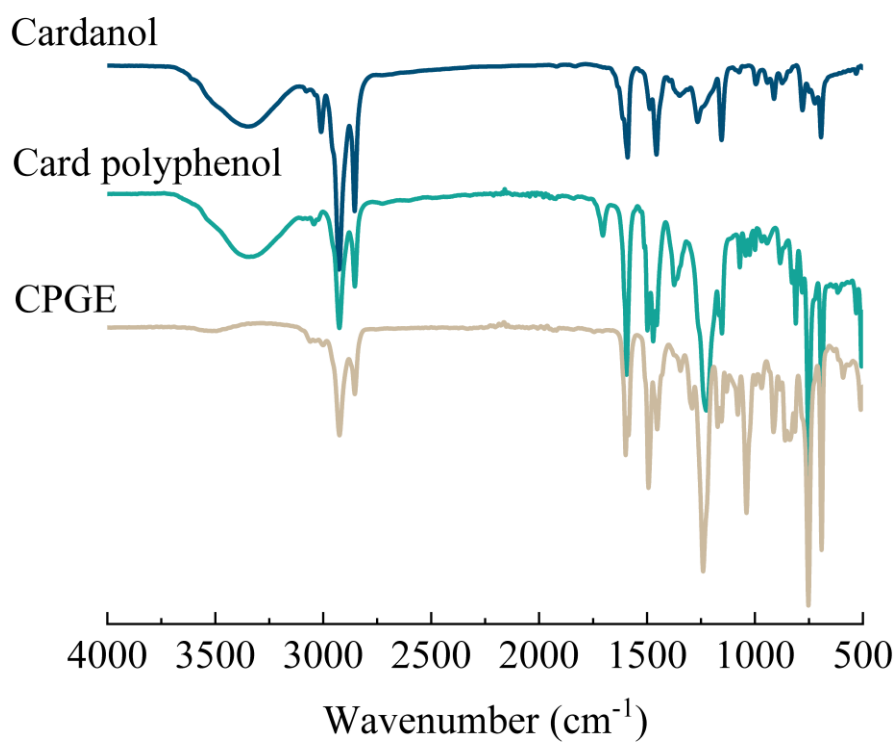

**Figure S1.** FT-IR spectra of cardanol, card polyphenol and CPGE

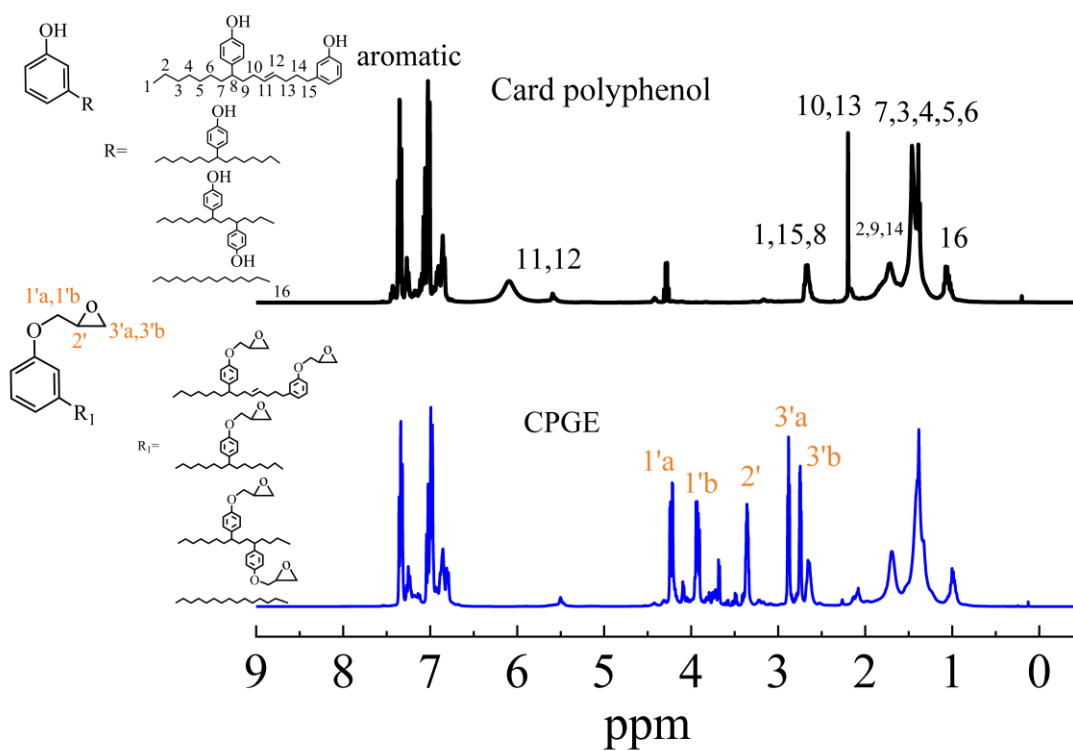

**Figure S2.**  $^1\text{H}$  NMR spectra of card polyphenol and CPGE



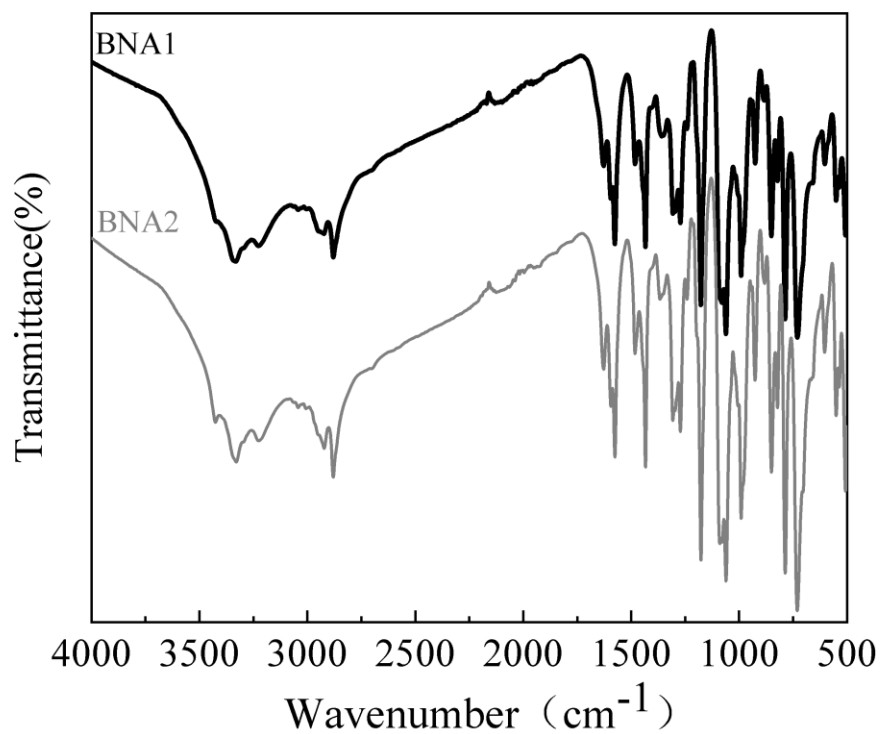

**Figure S3.** FT-IR spectra of BNA1 and BNA2

In the FT-IR spectra, BNAs show the characteristic absorption bands of typical boronic esters: 1454,1357,1240, 1307, 1040 <sup>[6]</sup>.

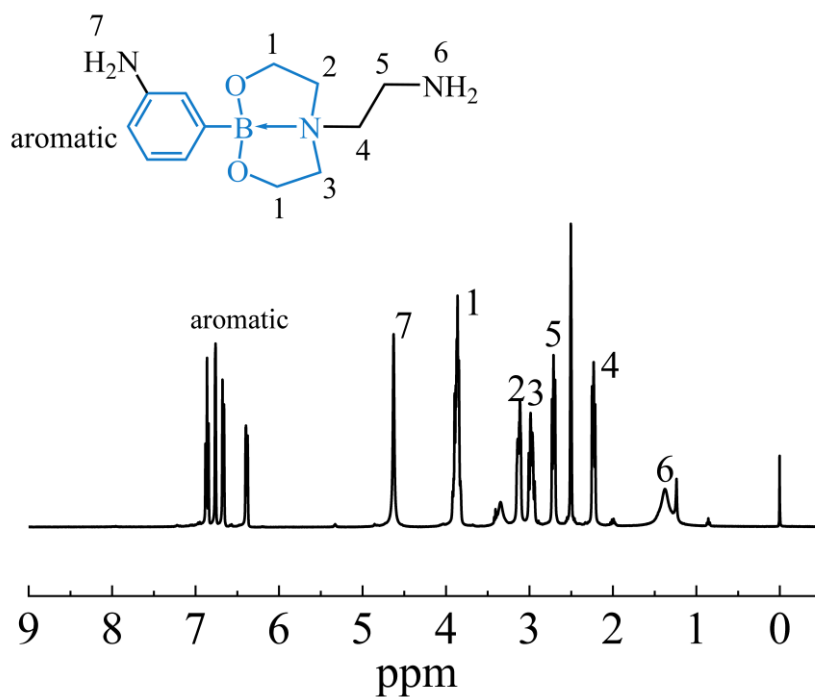

**Figure S4.** <sup>1</sup>H NMR spectra of BNA1

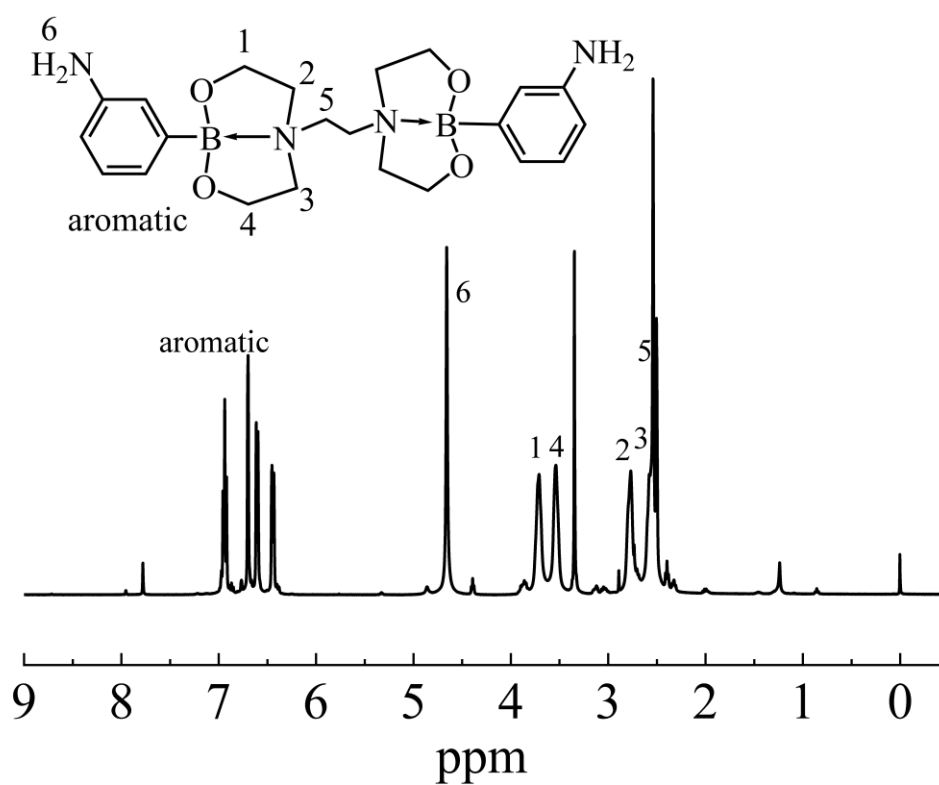

**Figure S5.**  $^1\text{H}$  NMR spectra of BNA2

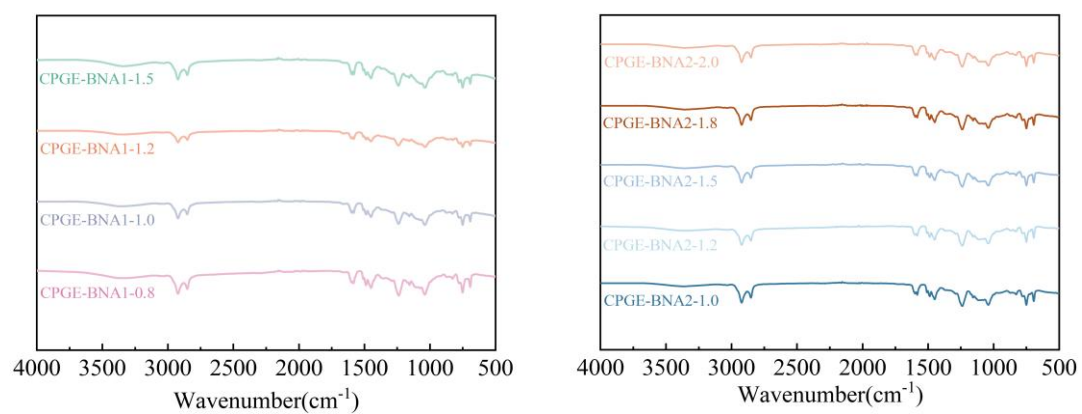

**Figure S6.** FT-IR spectra of CPGE-BNAs

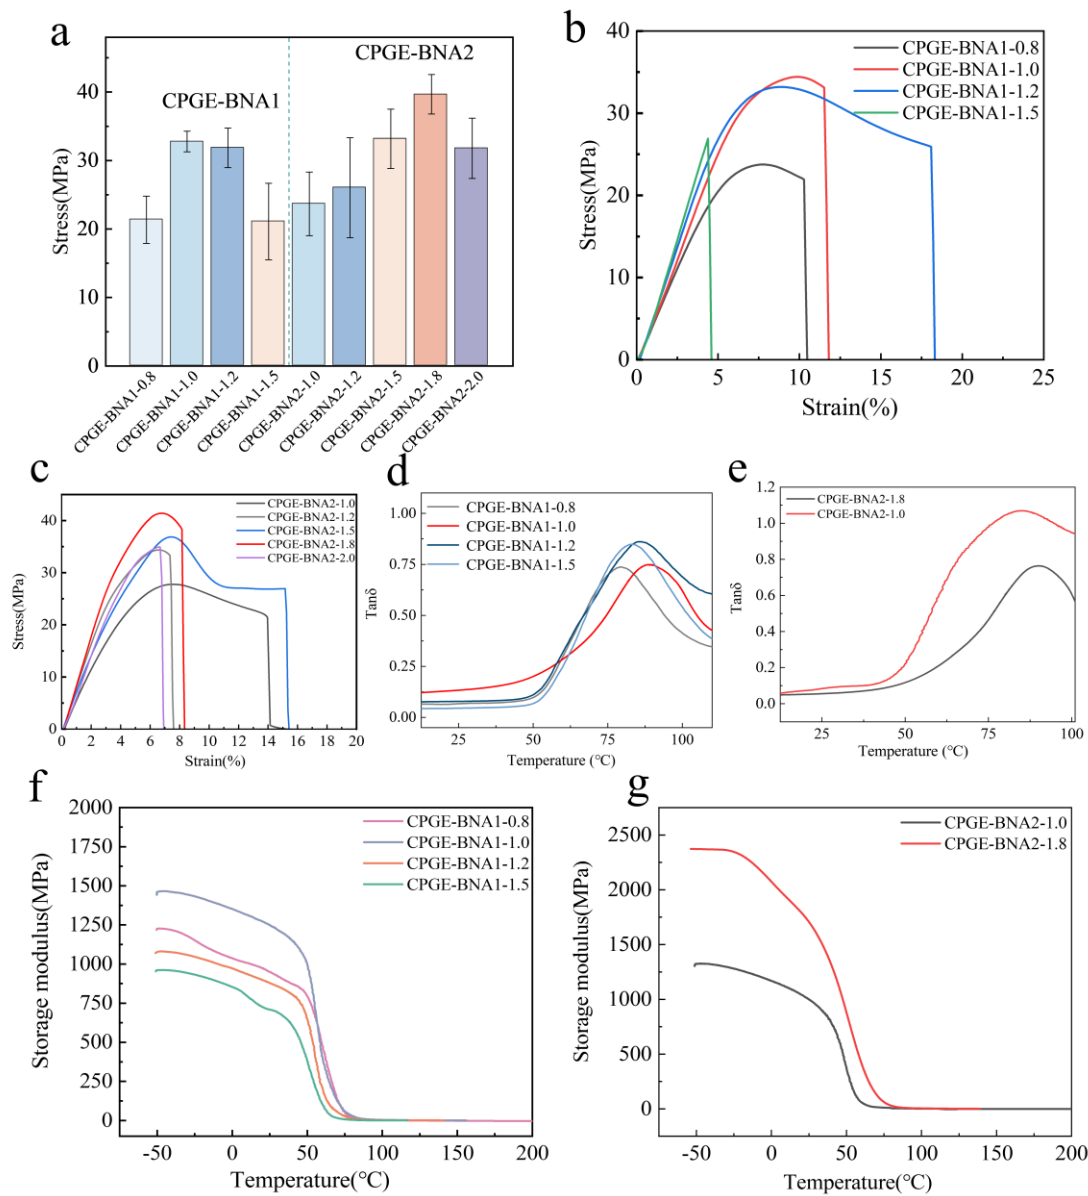

**Figure S7.** (a)The mechanical properties, (b,c) stress–strain curves of CPGE-BNA1 and CPGE-BNA2, (d,e)  $\tan \delta$  and (f,g)  $E$  of CPGE-BNA1 and CPGE-BNA2

**Table S1** Mechanical and thermal properties of CPGE-BNA1 and CPGE-BNA2

| Sample        | Tensile Strength<br>(MPa) | $T_g$<br>(°C) | $E'_{25}$<br>(MPa) | $\nu_e$<br>( $10^3\text{mol/m}^3$ ) |
|---------------|---------------------------|---------------|--------------------|-------------------------------------|
| CPGE-BNA1-0.8 | 21.35±3.45                | 78.99         | 949                | 0.16                                |
| CPGE-BNA1-1.0 | 32.77±1.51                | 88.97         | 1249               | 0.33                                |
| CPGE-BNA1-1.2 | 31.86±2.89                | 84.80         | 878                | 0.24                                |
| CPGE-BNA1-1.5 | 21.09±5.58                | 82.45         | 711                | 0.05                                |
| CPGE-BNA2-1.0 | 23.67±4.64                | 83.49         | 998                | 0.20                                |
| CPGE-BNA2-1.2 | 26.03±7.30                | —             | —                  | —                                   |
| CPGE-BNA2-1.5 | 33.17±4.33                | —             | —                  | —                                   |
| CPGE-BNA2-1.8 | 39.67±2.88                | 89.72         | 1700               | 0.34                                |
| CPGE-BNA2-2.0 | 31.79±4.40                | —             | —                  | —                                   |

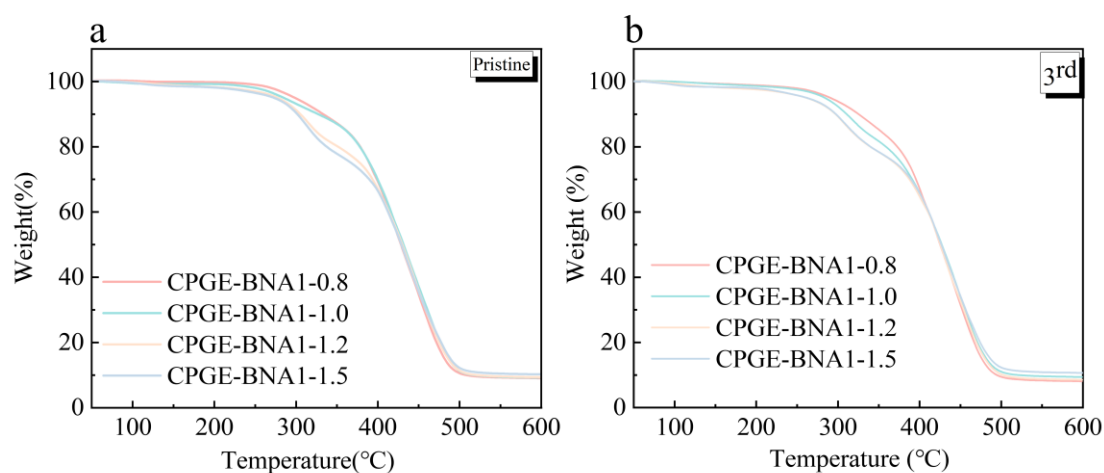**Figure S8.** TGA of original and 3rd reprocessed CPGE-BNA1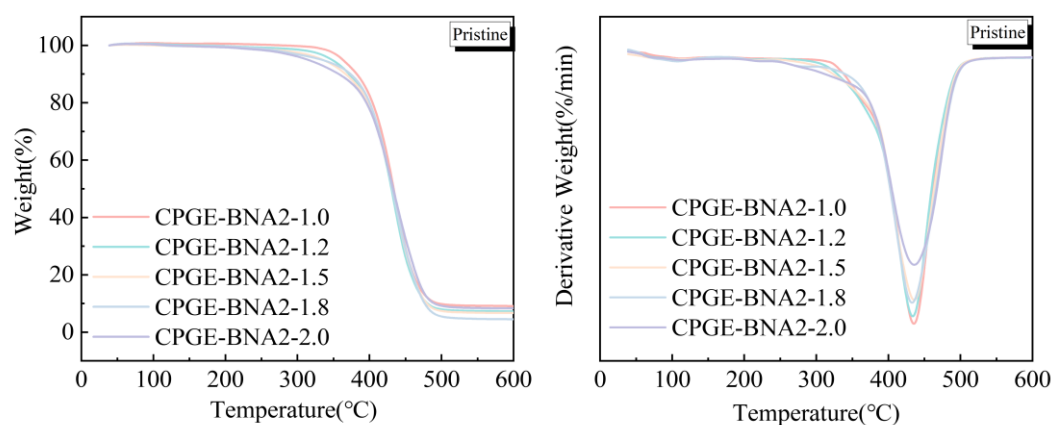**Figure S9.** TGA and DTG of CPGE-BNA2

**Table S2** Thermal degradation results of original and 3rd reprocessed CPGE-BNA1

| Sample        |          | $T_{-5\%}$<br>(°C) | $T_{\max}$ (°C) |        | Char yield<br>(%) |
|---------------|----------|--------------------|-----------------|--------|-------------------|
|               |          |                    | I               | II     |                   |
| CPGE-BNA1-0.8 | pristine | 297.89             |                 | 437.48 | 9.09              |
|               | 3rd      | 290.65             |                 | 439.40 | 8.10              |
| CPGE-BNA1-1.0 | pristine | 284.81             | 311.71          | 443.63 | 9.26              |
|               | 3rd      | 283.93             | 317.93          | 449.93 | 9.41              |
| CPGE-BNA1-1.2 | pristine | 277.85             | 312.96          | 436.23 | 9.37              |
|               | 3rd      | 261.11             | 308.11          | 430.11 | 8.56              |
| CPGE-BNA1-1.5 | pristine | 271.91             | 290.26          | 444.76 | 10.25             |
|               | 3rd      | 262.11             | 309.11          | 435.11 | 10.68             |

**Table S3** Thermal degradation results of CPGE-BNA2

| Sample        | $T_{-5\%}$ (°C) | $T_{\max}$ (°C) | Char yield (%) |
|---------------|-----------------|-----------------|----------------|
| CPGE-BNA2-1.0 | 362.53          | 435.53          | 9.12           |
| CPGE-BNA2-1.2 | 347.85          | 433.85          | 7.24           |
| CPGE-BNA2-1.5 | 334.89          | 435.89          | 6.69           |
| CPGE-BNA2-1.8 | 332.85          | 432.85          | 4.49           |
| CPGE-BNA2-2.0 | 313.86          | 435.86          | 8.30           |

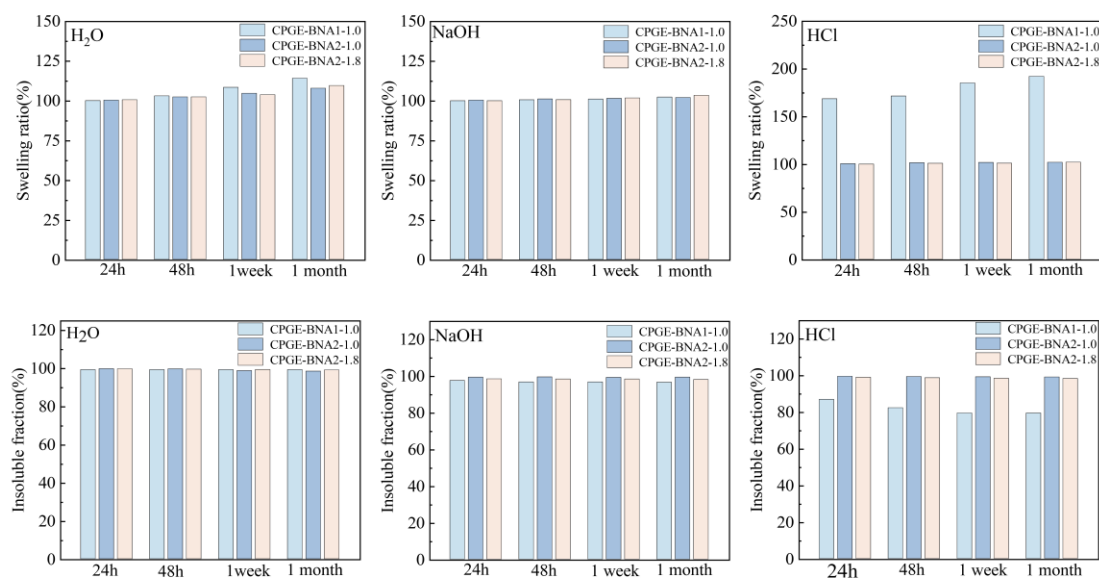**Figure S10.** Swelling ratio and insoluble fraction for CPGE-BNA1-1.0, CPGE-BNA2-1.0, and CPGE-BNA2-1.8 in H<sub>2</sub>O, NaOH, and HCl at different times

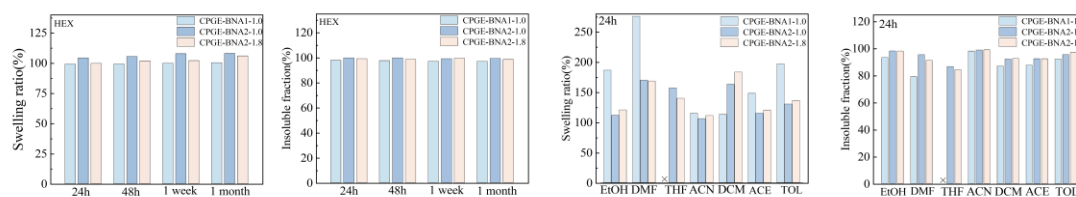

**Figure S11.** Swelling ratio and insoluble fraction for CPGE-BNA1-1.0, CPGE-BNA2-1.0, and CPGE-BNA2-1.8 in different solvents at different times

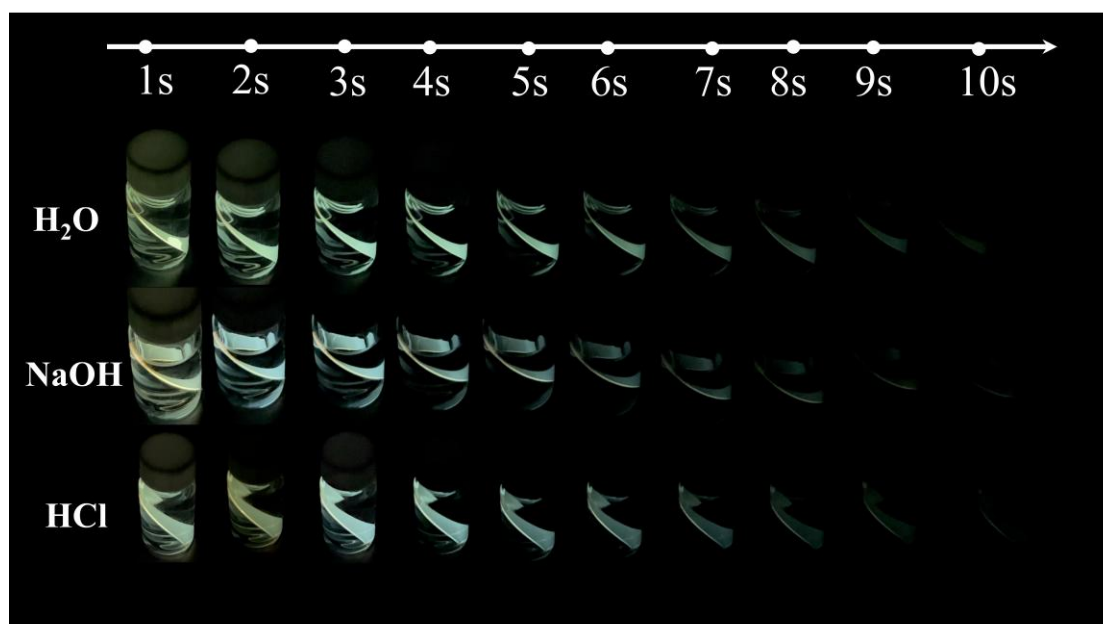

**Figure S12.** Afterglow images of CPGE-BNA2-1.0 excited at 365 nm immersed in H<sub>2</sub>O, HCl, NaOH for four weeks

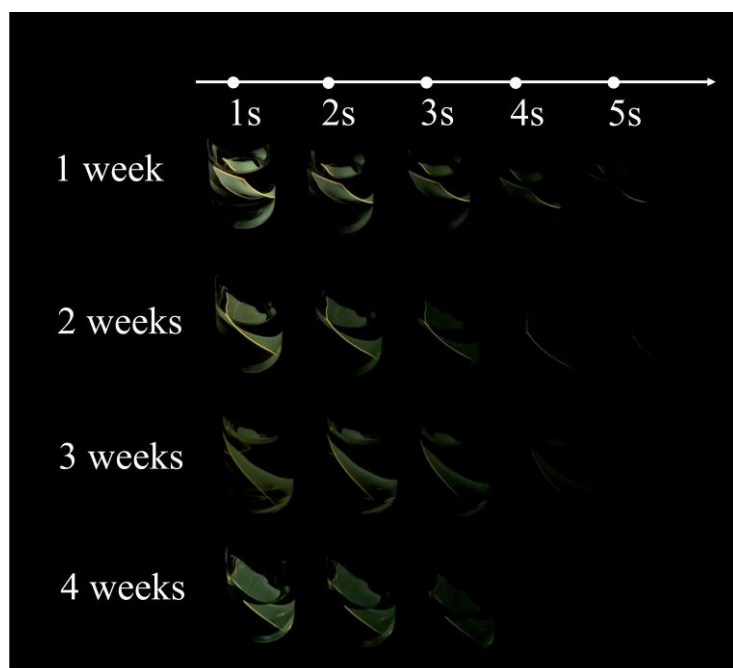

**Figure S13.** Afterglow images of CPGE-BNA2-1.0 excited at 365 nm in hexane at different times

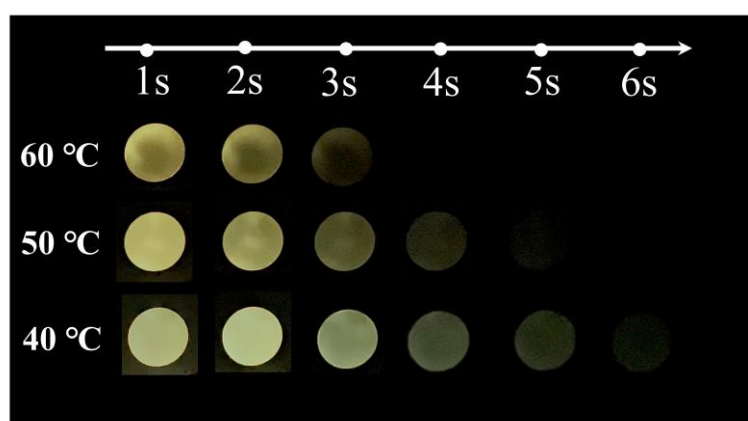

**Figure S14.** Afterglow images of CPGE-BNA2-1.0 excited at 365 nm at different temperatures

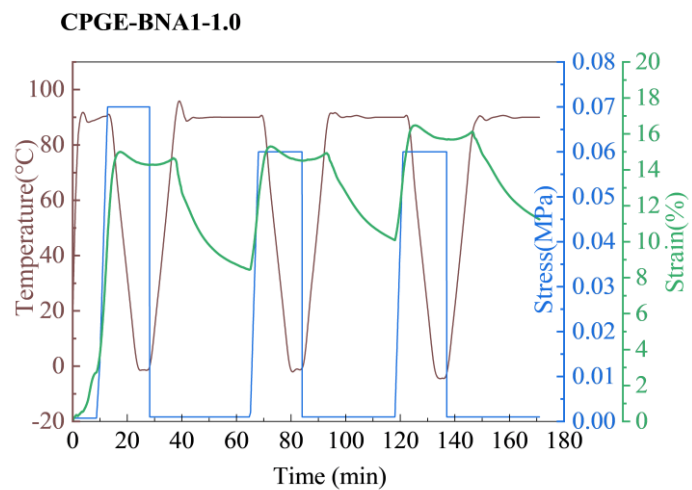

**Figure S15.** Consecutive shape memory cycles of CPGE-BNA1-1.0

**Table S4** Shape fixity and recovery properties of CPGE-BNA1-1.0, CPGE-BNA2-1.0 and CPGE-BNA2-1.8

|       | Cycle | CPGE-BNA1-1.0 (%) | CPGE-BNA2-1.0 (%) | CPGE-BNA2-1.8 (%) |
|-------|-------|-------------------|-------------------|-------------------|
| $R_f$ | 1     | 97.73             | 96.66             | 96.81             |
|       | 2     | 97.52             | 96.42             | 96.77             |
|       | 3     | 97.94             | 97.70             | 96.76             |
| $R_r$ | 1     | 53.48             | 87.75             | 95.84             |
|       | 2     | 75.91             | 91.57             | 97.40             |
|       | 3     | 82.10             | ~100              | ~100              |



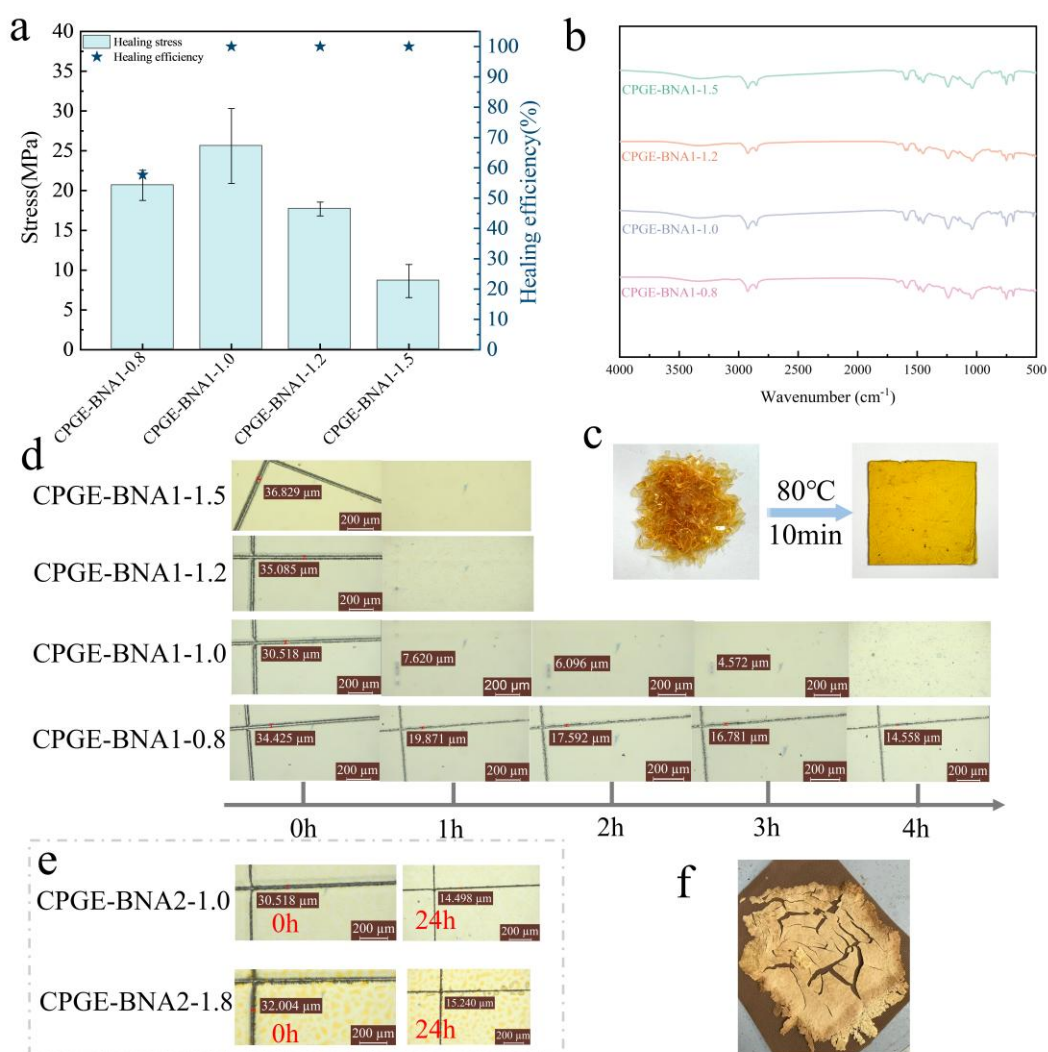

**Figure S16.** Recyclability and self-healing of CPGE-BNA1 system polymers: (a) Healing efficiency and mechanical properties of the recycled CPGE-BNA1 polymers after hot processing. (b) FT-IR spectra. (c) Images recording the reprocessing of CPGE-BNA1 system polymers from fractured pieces into a new film via thermal processing. (d) Scratch-repairing images of the CPGE-BNA1 system polymers. (e) Scratch-repairing images of the CPGE-BNA2-1.0 and CPGE-BNA2-1.8. (f) Images recording the reprocessing of CPGE-BNA2-1.0 from fractured pieces.

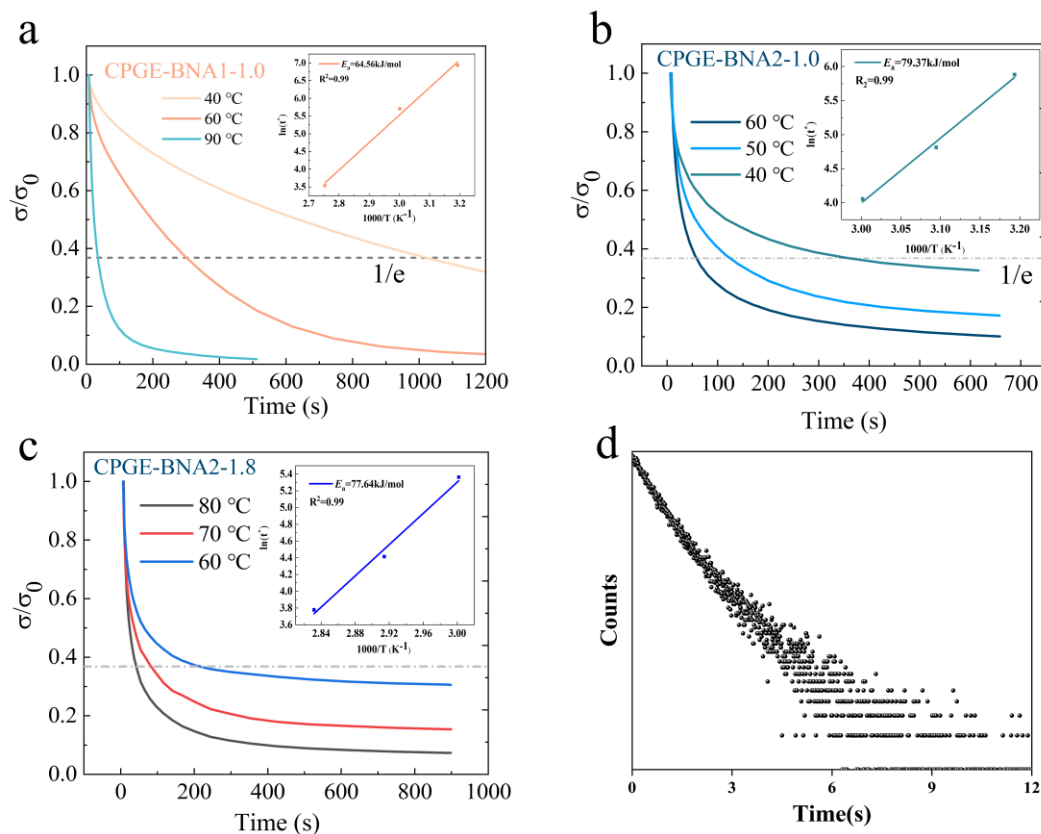

**Figure S17.** Stress relaxation curves and the relationship between  $\ln(\tau^*)$  and temperature: (a) CPGE-BNA1-1.0, (b) CPGE-BNA2-1.0 and (c) CPGE-BNA2-1.8 at different temperatures. (d) Time-resolved emission-decay curves of reprocessed CPGE-BNA1-1.0, excited at 365 nm.

## References

- 1 C. Bo, Y. Sha, F. Song, M. Zhang, L. Hu, P. Jia, Y. Zhou, *Journal of Cleaner Production*. 2022, **341**.
- 2 C. Bo, S. Guo, Y. Sha, L. Yuan, L. Hu, P. Jia, Y. Zhou, G. Feng, M. Zhang, *Composites Science and Technology*. 2022, **230**.
- 3 Y. Liu, S. Ma, Q. Li, S. Wang, K. Huang, X. Xu, B. Wang, J. Zhu, *European Polymer Journal*. 2020, **135**.
- 4 C. Hao, T. Liu, S. Zhang, L. Brown, R. Li, J. Xin, T. Zhong, L. Jiang, J. Zhang, *ChemSusChem*. 2019, **12**, 1049-1058.
- 5 H. Memon, H. Liu, M. A. Rashid, L. Chen, Q. Jiang, L. Zhang, Y. Wei, W. Liu, Y. Qiu, *Macromolecules*. 2020, **53**, 621-630.
- 6 H. Kang, W. Wei, L. Sun, R. Yu, E. Yang, X. Wu, H. Dai, *Chemistry of Materials*. 2023, **35**, 2408-2420.
